# Supplementary material
Source: MDPI journal article supplement (https://www.mdpi.com/2073-4441/13/1/103)
Supplement: s1 [file s1]

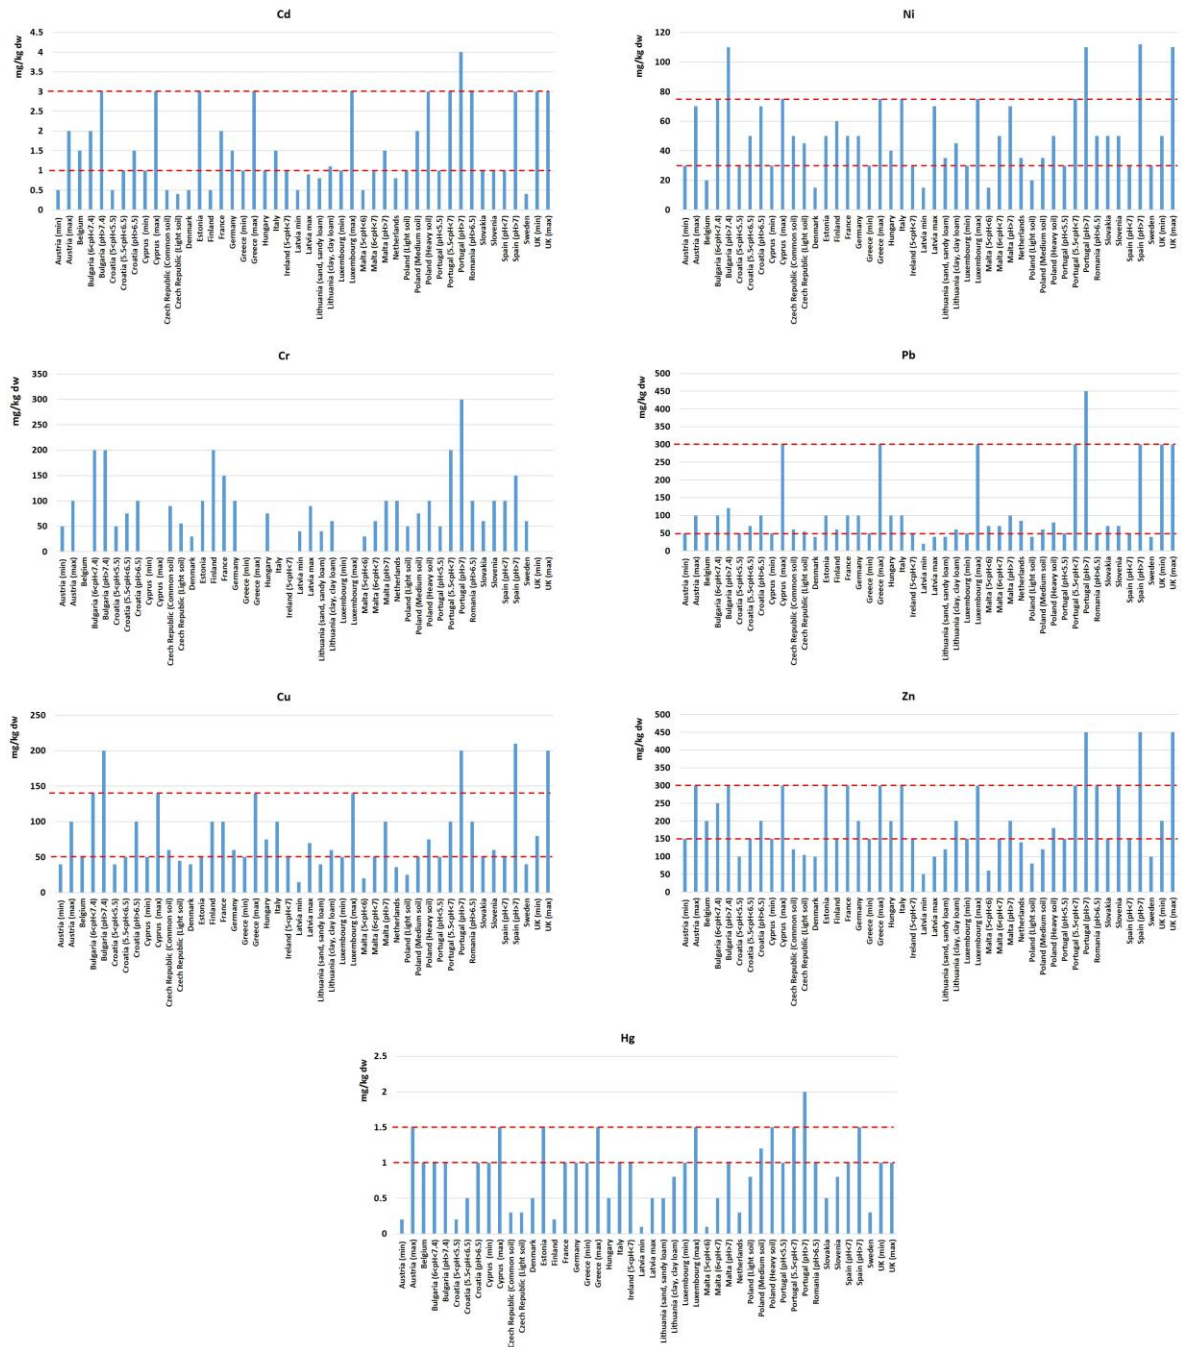

**Figure S1.** Limits of Heavy Metals for sludge-treated soils (mg/kg dw of soil; Dotted lines: limits proposed by Directive 86/278/EEC).
